# Supplementary material for: Selective photoreduction of carbon dioxide to formic acid using Cs3Bi2Cl9–Ir/IrOx hybrid materials
Source: Royal Society of Chemistry journal article supplement (doi:10.1039/d4dt02720e), 2024-11-26
Supplement: d4dt02720e1.pdf [file d4dt02720e1.pdf]

## **Selective photoreduction of carbon dioxide to formic acid using Cs<sub>3</sub>Bi<sub>2</sub>Cl<sub>9</sub>-Ir/IrO<sub>x</sub> hybrid materials**

*Govardhan Pandurangappa, Alamelu Kaliyaperumal, Raghuram Chetty, \* and Aravind Kumar Chandiran\**

Department of Chemical Engineering, Indian Institute of Technology Madras, Chennai, Tamil Nadu 600036, India.

\*raghuc@iitm.ac.in, aravindkumar@iitm.ac.in

### **Electronic Supplementary Information**

**Table S1.** Iridium content analysis of catalyst samples by ICP-OES.

| S. No | Sample                                                                   | g      | Wavelength (nm) | Dilution Factor |
|-------|--------------------------------------------------------------------------|--------|-----------------|-----------------|
| 1     | Cs <sub>3</sub> Bi <sub>2</sub> Cl <sub>9</sub>                          | 0.0156 | Bi-223.061      | 10              |
| 2     | Cs <sub>3</sub> Bi <sub>2</sub> Cl <sub>9</sub> -<br>Ir/IrO <sub>x</sub> | 0.0157 | Bi-223.061      | 10              |
|       |                                                                          | 0.0157 | Ir-205.222      | 1               |

**Table.S2.** Fitting parameters for time resolved PL studies using a tri-exponential function.

| Sample                                                                   | $\tau_1$ (ns) | A <sub>1</sub> | $\tau_2$ (ns) | A <sub>2</sub> | $\tau_3$ (ns) | A <sub>3</sub> |
|--------------------------------------------------------------------------|---------------|----------------|---------------|----------------|---------------|----------------|
| Cs <sub>3</sub> Bi <sub>2</sub> Cl <sub>9</sub>                          | 3.85          | 33.84          | 12.36         | 31.04          | 0.52          | 35.12          |
| Cs <sub>3</sub> Bi <sub>2</sub> Cl <sub>9</sub> -<br>Ir/IrO <sub>x</sub> | 4.55          | 28.05          | 13.17         | 19.06          | 0.46          | 52.89          |

Where A<sub>1</sub>, A<sub>2</sub>, and A<sub>3</sub> are relative amplitudes.

**Table.S3.** EDAX analysis of Cs<sub>3</sub>Bi<sub>2</sub>Cl<sub>9</sub>.

| Element | Weight (%) | Atomic (%) |
|---------|------------|------------|
| Cl K    | 26.82      | 62.75      |
| Cs L    | 36.09      | 22.52      |
| Bi M    | 37.09      | 14.72      |
| Totals  |            | 100.00     |

**Table.S4.** EDAX analysis of Cs<sub>3</sub>Bi<sub>2</sub>Cl<sub>9</sub>-Ir/IrO<sub>x</sub>.

| Element | Weight (%) | Atomic (%) |
|---------|------------|------------|
| Cl K    | 23.61      | 58.87      |
| Cs L    | 35.74      | 23.76      |
| Ir M    | 4.86       | 2.24       |
| Bi M    | 35.79      | 15.14      |
| Totals  |            | 100.00     |

**Table.S5.** A comparison of data with other materials which belongs to same class.

| Catalyst                                                                                                                                                                                                                                                 | Light source                         | Reaction mode                                  | Product ( $\mu\text{mol g}^{-1} \text{h}^{-1}$ )                                                                                 | Ref.      |
|----------------------------------------------------------------------------------------------------------------------------------------------------------------------------------------------------------------------------------------------------------|--------------------------------------|------------------------------------------------|----------------------------------------------------------------------------------------------------------------------------------|-----------|
| Cs <sub>3</sub> Bi <sub>2</sub> Cl <sub>9</sub><br>Cs <sub>3</sub> Bi <sub>2</sub> Br <sub>9</sub><br>Cs <sub>3</sub> Bi <sub>2</sub> I <sub>9</sub>                                                                                                     | 300W Xe arc lamp                     | Gas-solid (CO <sub>2</sub> + H <sub>2</sub> O) | CO-16.6<br>CO-26.9<br>CO-1.1                                                                                                     | 1         |
| Cs <sub>3</sub> Bi <sub>2</sub> (Cl <sub>0.5</sub> Br <sub>0.5</sub> ) <sub>9</sub><br>Cs <sub>3</sub> Bi <sub>2</sub> (Br <sub>0.5</sub> I <sub>0.5</sub> ) <sub>9</sub><br>Cs <sub>3</sub> Bi <sub>2</sub> I <sub>9</sub>                              | 300 W Xe arc lamp $\lambda > 420$ nm | Gas-solid (CO <sub>2</sub> + H <sub>2</sub> O) | CO-16<br>CO-18<br>CO-3.6                                                                                                         | 2         |
| Cs <sub>3</sub> Bi <sub>2</sub> I <sub>9</sub><br>Rb <sub>3</sub> Bi <sub>2</sub> I <sub>9</sub><br>(CH <sub>3</sub> NH <sub>3</sub> ) <sub>3</sub> Bi <sub>2</sub> I <sub>9</sub>                                                                       | 32 W UV-B (305 nm)                   | Gas-solid (CO <sub>2</sub> + H <sub>2</sub> O) | CO-7.7, CH <sub>4</sub> -1.4<br>CO-1.8, CH <sub>4</sub> -1.7<br>CO-0.7, CH <sub>4</sub> -0.9                                     | 3         |
| Cs <sub>3</sub> Bi <sub>2</sub> Br <sub>9</sub> (CBB)<br>3CBB/Bi-MOF<br>3CBB: Bi-MOF<br>Bi-MOF                                                                                                                                                           | 300 W Xe lamp                        | Gas-solid (CO <sub>2</sub> + H <sub>2</sub> O) | CO-150, CH <sub>4</sub> -11.5<br>CO-572.2, CH <sub>4</sub> -32.5<br>CO-230, CH <sub>4</sub> -8.0<br>CO-130, CH <sub>4</sub> -7.0 | 4         |
| Cs <sub>3</sub> Bi <sub>2</sub> I <sub>9</sub><br>Cs <sub>3</sub> Bi <sub>2</sub> I <sub>9</sub> / Bi <sub>2</sub> WO <sub>6</sub><br>Cs <sub>3</sub> Bi <sub>2</sub> I <sub>9</sub> :Bi <sub>2</sub> WO <sub>6</sub><br>Bi <sub>2</sub> WO <sub>6</sub> | 300 W Xe arc lamp $\lambda > 400$ nm | Gas-solid (CO <sub>2</sub> + H <sub>2</sub> O) | CO-1.8<br>CO-7.3<br>CO-2.5<br>CO-0.2                                                                                             | 5         |
| Cs <sub>2</sub> Bi <sub>2</sub> Cl <sub>9</sub>                                                                                                                                                                                                          | 5 W UV Led                           | Acetonitrile + H <sub>2</sub> O (99:1 vol%)    | HCOOH-115.6<br>CO-53.8<br>CH <sub>4</sub> -6.7                                                                                   | This work |
| Cs <sub>2</sub> Bi <sub>2</sub> Cl <sub>9</sub> -Ir/IrO <sub>x</sub>                                                                                                                                                                                     | 5 W UV Led                           | Acetonitrile + H <sub>2</sub> O (99:1 vol%)    | HCOOH -168.2<br>CO-38<br>CH <sub>4</sub> -4.5                                                                                    | This work |

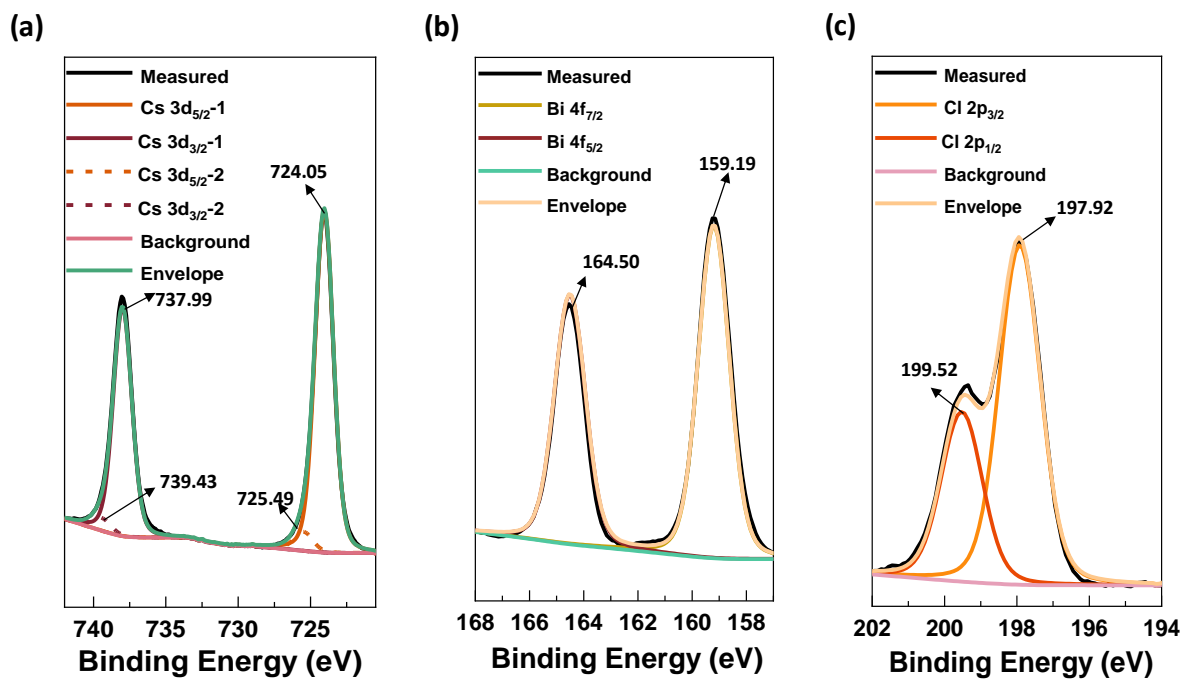

Figure S1. XPS analysis of Cs<sub>3</sub>Bi<sub>2</sub>Cl<sub>9</sub> before CO<sub>2</sub> photoreduction: (a) Cs 3d (b) Bi 4f (c) Cl 2p.

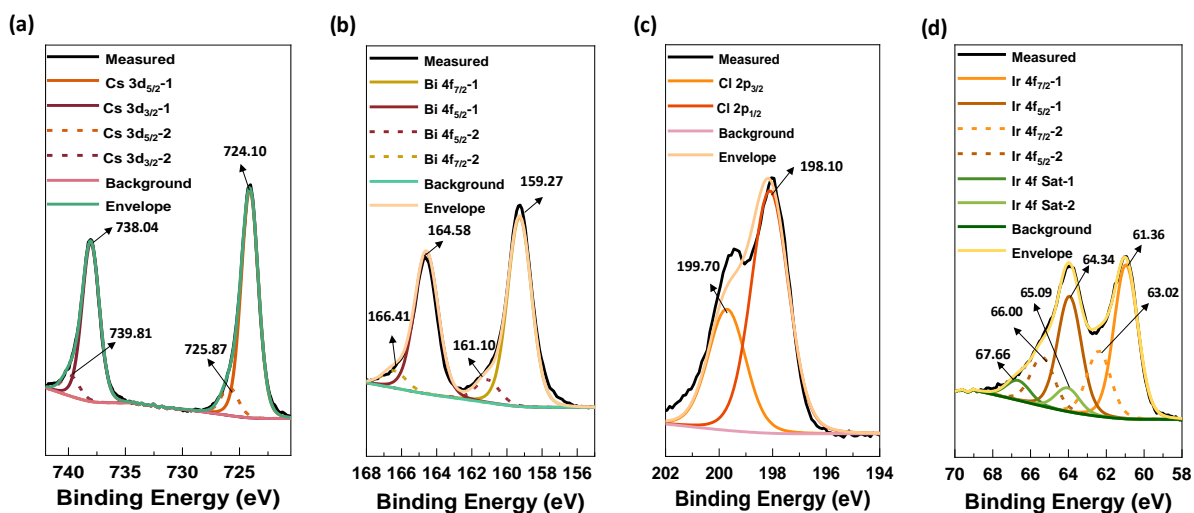

Figure S2. XPS analysis of Cs<sub>3</sub>Bi<sub>2</sub>Cl<sub>9</sub>-Ir/IrO<sub>x</sub> before CO<sub>2</sub> photoreduction: (a) Cs 3d (b) Bi 4f (c) Cl 2p (d) Ir 4f.

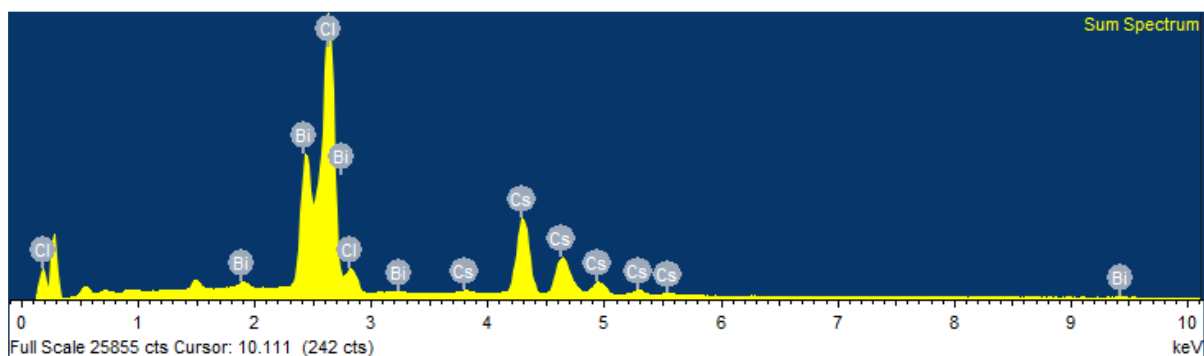

Figure.S3. EDAX spectra of Cs<sub>3</sub>Bi<sub>2</sub>Cl<sub>9</sub>.

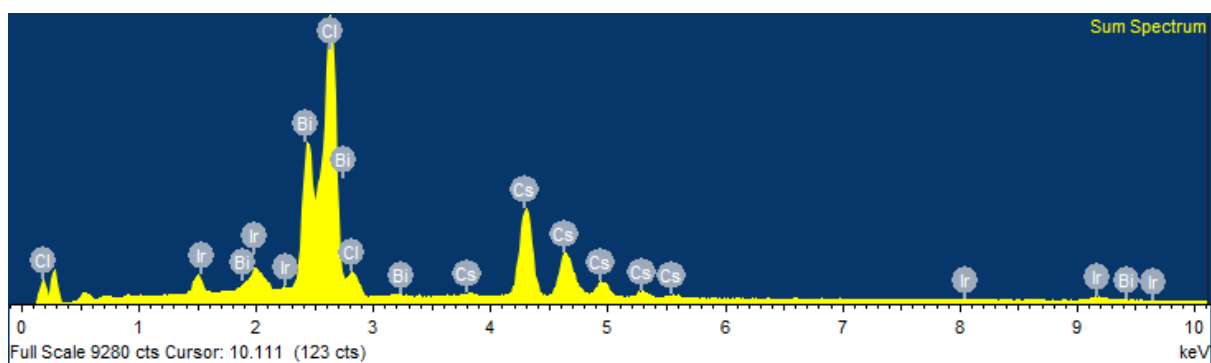

Figure.S4. EDAX spectra of  $\text{Cs}_3\text{Bi}_2\text{Cl}_9\text{-Ir/IrO}_x$ .

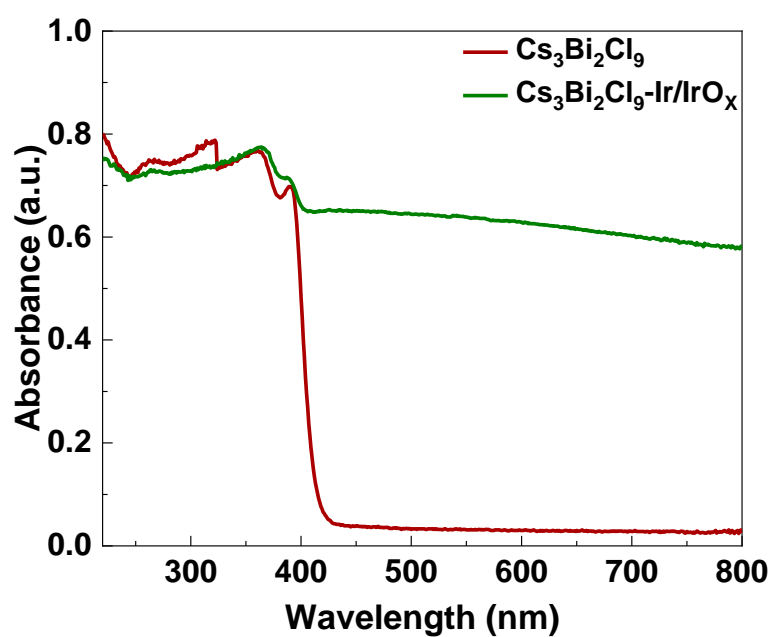

Figure S5. Absolute values of absorbance for  $\text{Cs}_3\text{Bi}_2\text{Cl}_9$  and  $\text{Cs}_3\text{Bi}_2\text{Cl}_9\text{-Ir/IrO}_x$ .

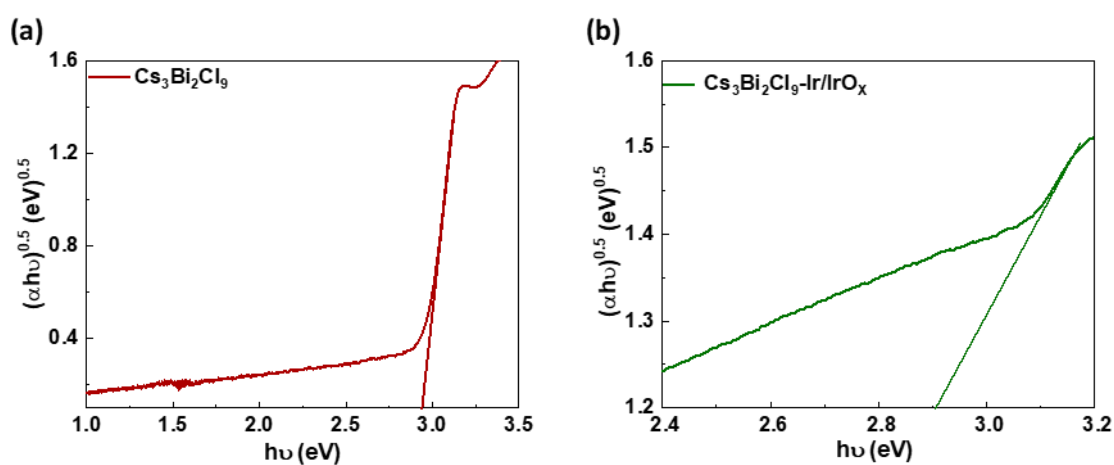

Figure S6. Tauc plot of (a)  $\text{Cs}_3\text{Bi}_2\text{Cl}_9$  and (b)  $\text{Cs}_3\text{Bi}_2\text{Cl}_9\text{-Ir/IrO}_x$ .

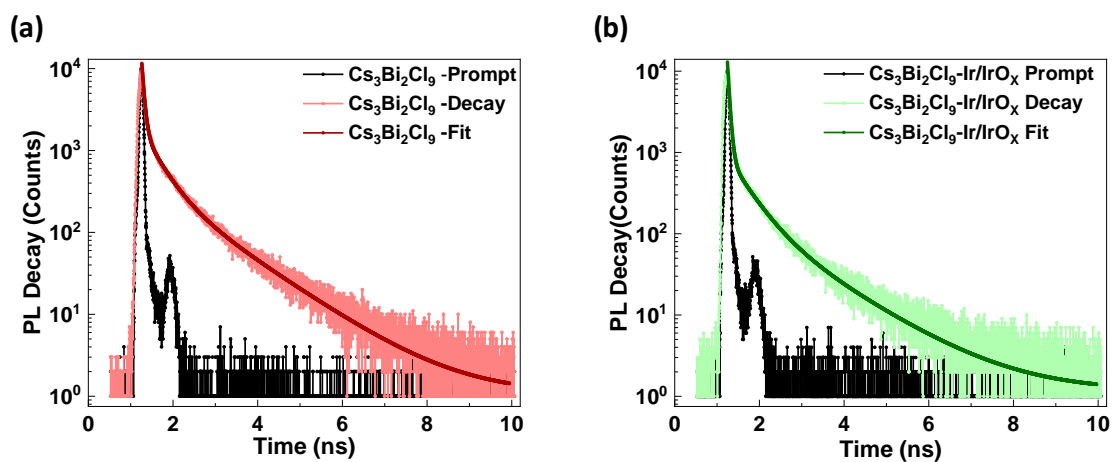

Figure S7. PL decay studies of (a)  $\text{Cs}_3\text{Bi}_2\text{Cl}_9$  and (b)  $\text{Cs}_3\text{Bi}_2\text{Cl}_9\text{-Ir/IrO}_x$ .

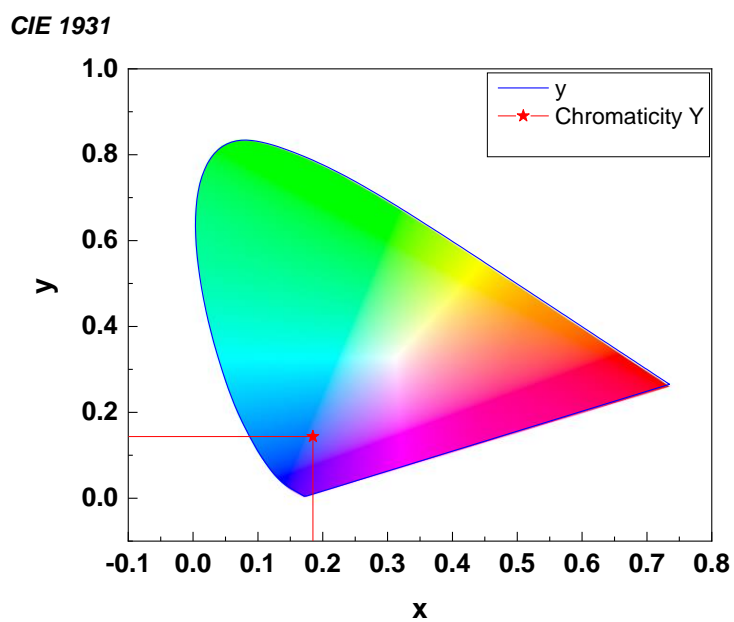

$$(x, y) = (0.18491, 0.14361)$$

Figure S8. CIE color coordinates of  $\text{Cs}_3\text{Bi}_2\text{Cl}_9$ .

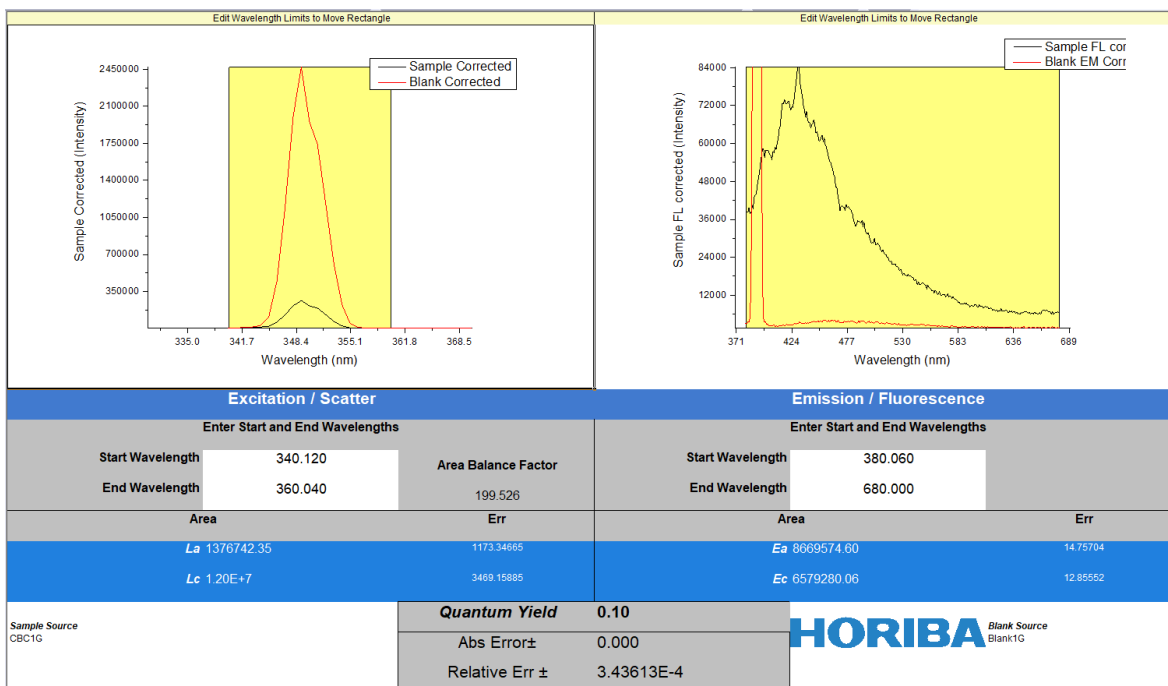

Figure S9. PLQY yield of  $\text{Cs}_3\text{Bi}_2\text{Cl}_9$ .

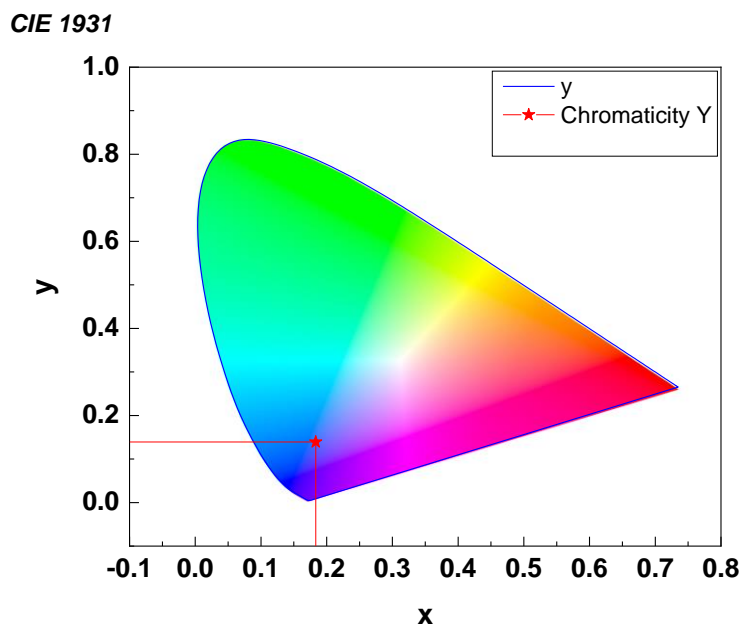

$$(x, y) = (0.18347, 0.13914)$$

Figure S10. CIE color coordinates of  $\text{Cs}_3\text{Bi}_2\text{Cl}_9\text{-Ir/IrO}_x$ .



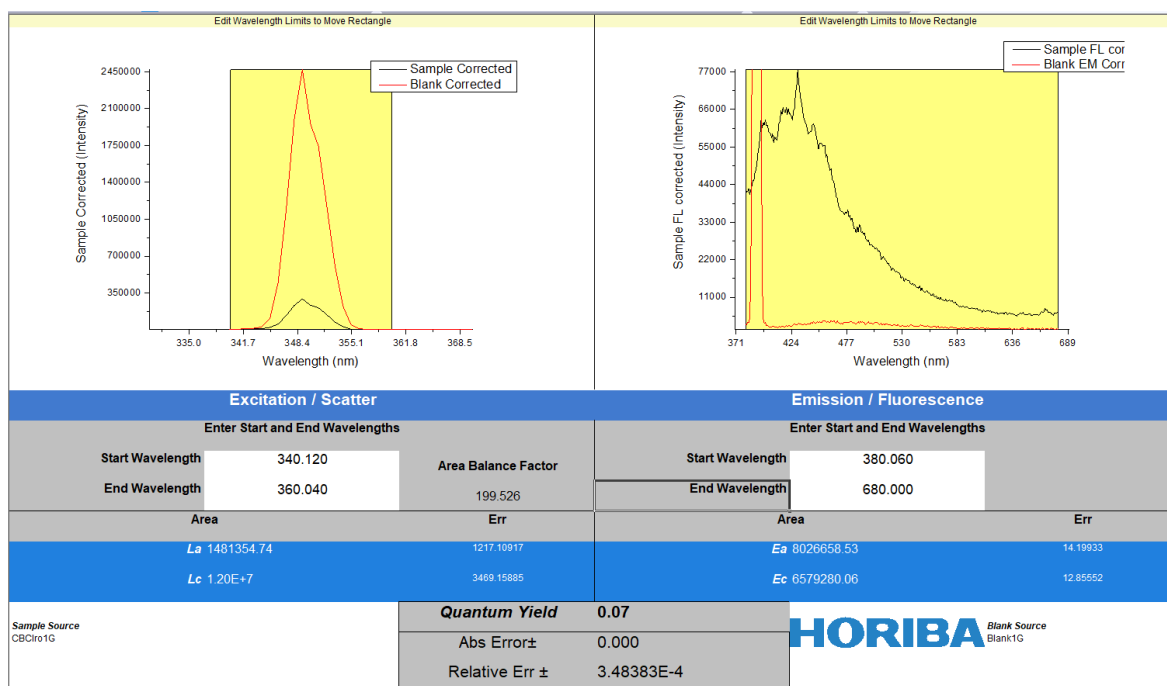

Figure S11. PLQ yield of  $\text{Cs}_3\text{Bi}_2\text{Cl}_9\text{-Ir/IrO}_x$ .

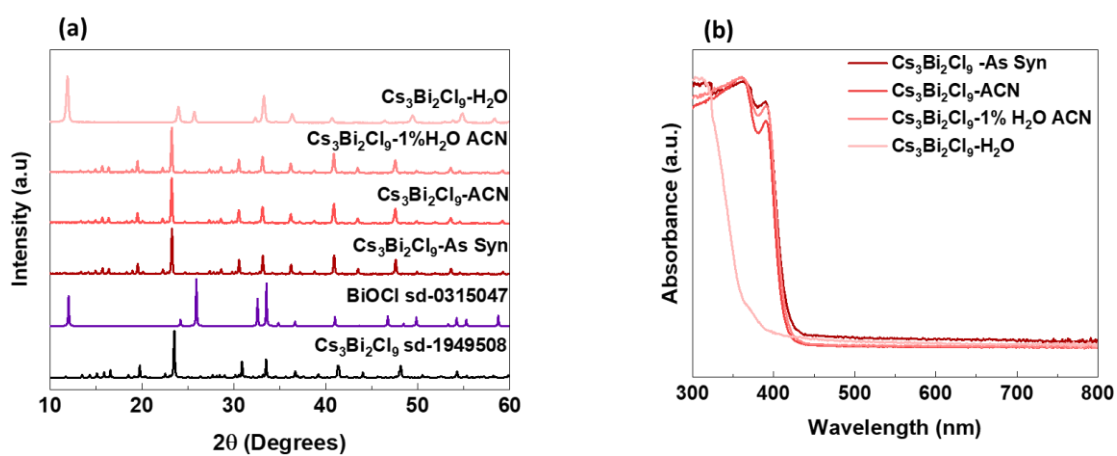

Figure S12. (a) PXRD patterns of  $\text{Cs}_3\text{Bi}_2\text{Cl}_9$  in different solvent acetonitrile (ACN) conditions under continuous stirring for 12 hours. (b) corresponding UV-Visible absorption spectra.

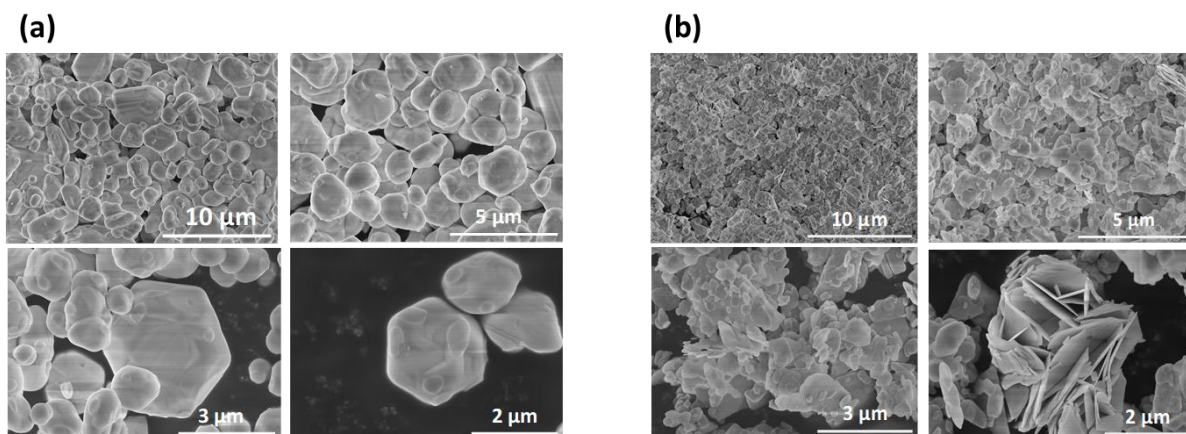

**Figure S13.** SEM images of (a) Cs<sub>3</sub>Bi<sub>2</sub>Cl<sub>9</sub> in 1 vol% H<sub>2</sub>O Acetonitrile (b) pure H<sub>2</sub>O.

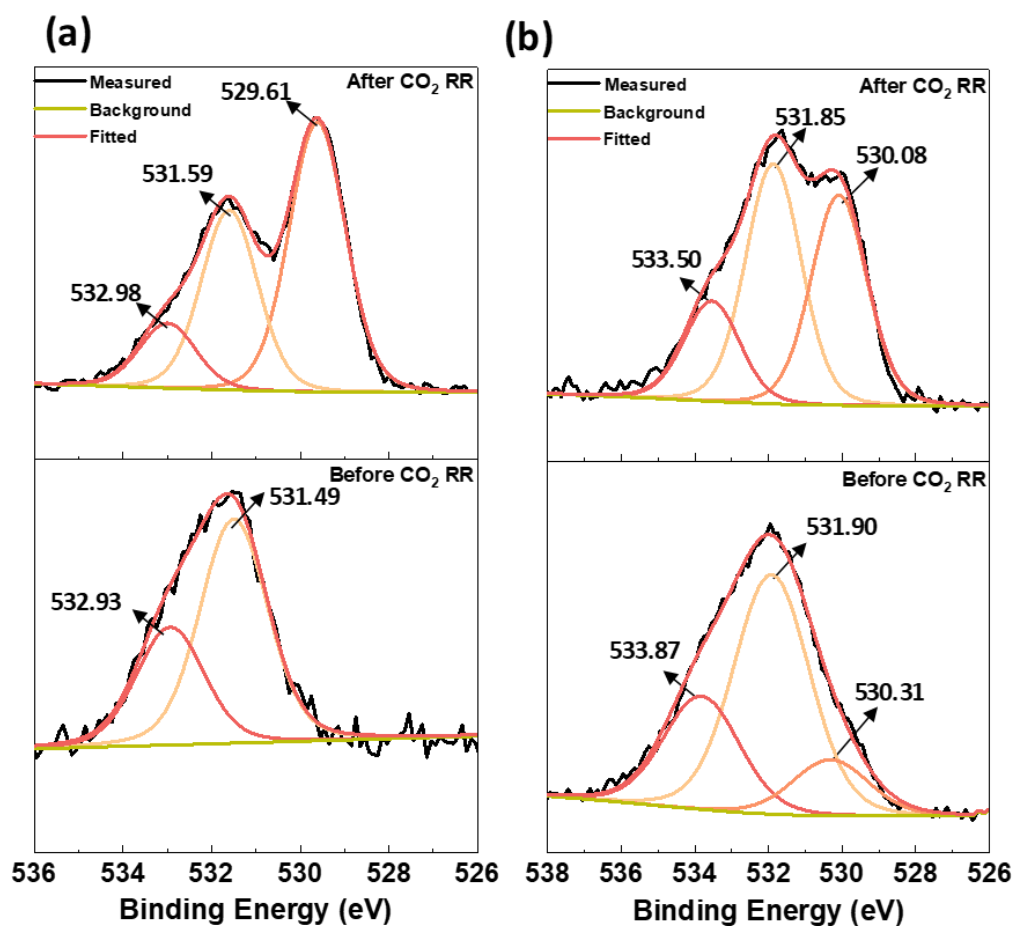

**Figure S14.** XPS spectra of O 1s (a) Cs<sub>3</sub>Bi<sub>2</sub>Cl<sub>9</sub> (b) Cs<sub>3</sub>Bi<sub>2</sub>Cl<sub>9</sub>-Ir/IrO<sub>x</sub> before and after CO<sub>2</sub> photoreduction.

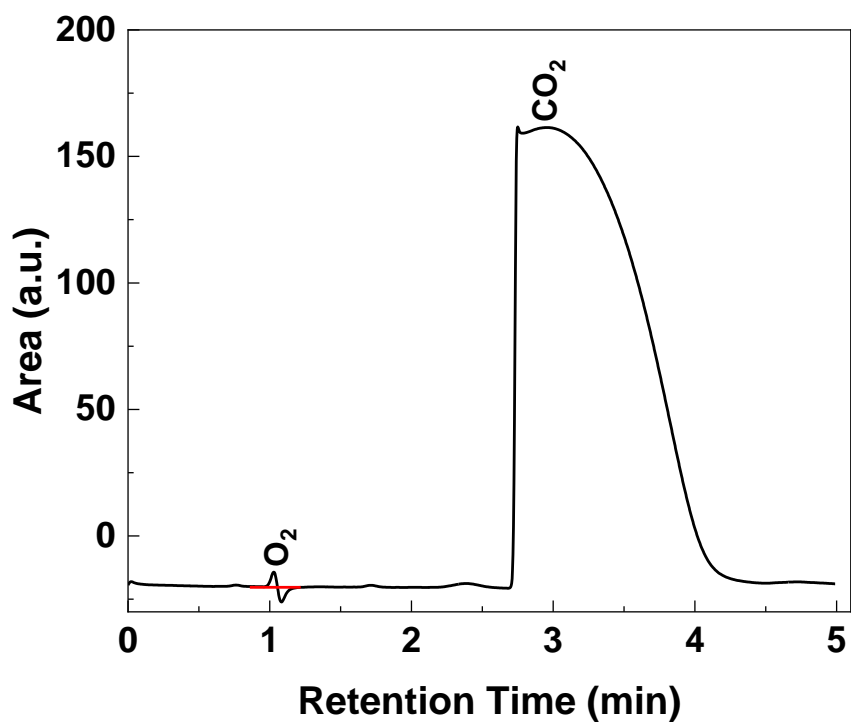

**Figure S15.** Gas chromatogram of Cs<sub>3</sub>Bi<sub>2</sub>Cl<sub>9</sub>-Ir/IrO<sub>x</sub> after 5 hours of photocatalytic CO<sub>2</sub> reduction reaction displaying small quantity of oxygen in the head space.

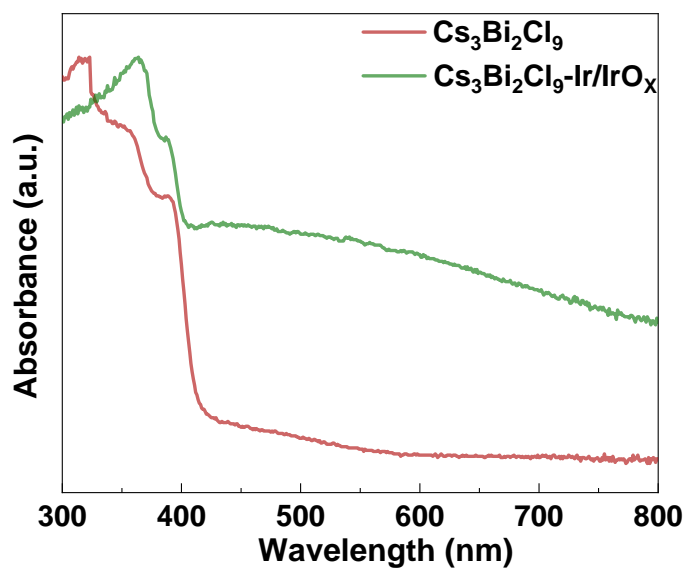

**Figure S16.** UV-Vis absorption spectra of Cs<sub>3</sub>Bi<sub>2</sub>Cl<sub>9</sub> and Cs<sub>3</sub>Bi<sub>2</sub>Cl<sub>9</sub>-Ir/IrO<sub>x</sub> after 5 hours of photocatalytic CO<sub>2</sub> reduction reaction.

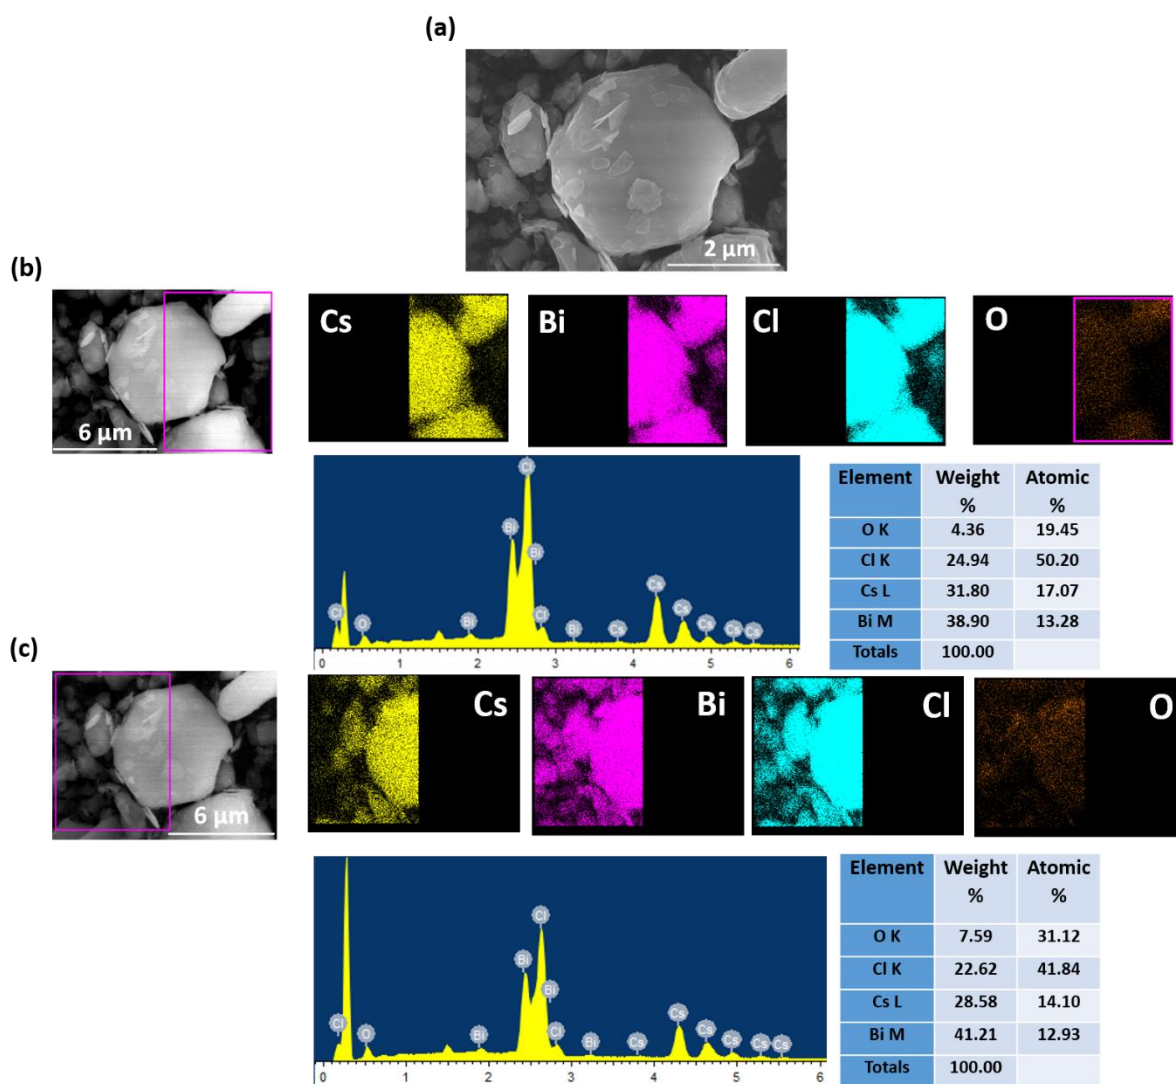

**Figure S17.** (a) SEM image of single  $\text{Cs}_3\text{Bi}_2\text{Cl}_9$  particle after 5 hours photocatalytic  $\text{CO}_2$  reduction displaying two different morphologies, EDAX mapping in (b) micro particle dominant portion and (c) dominant in the nanosheets portion.

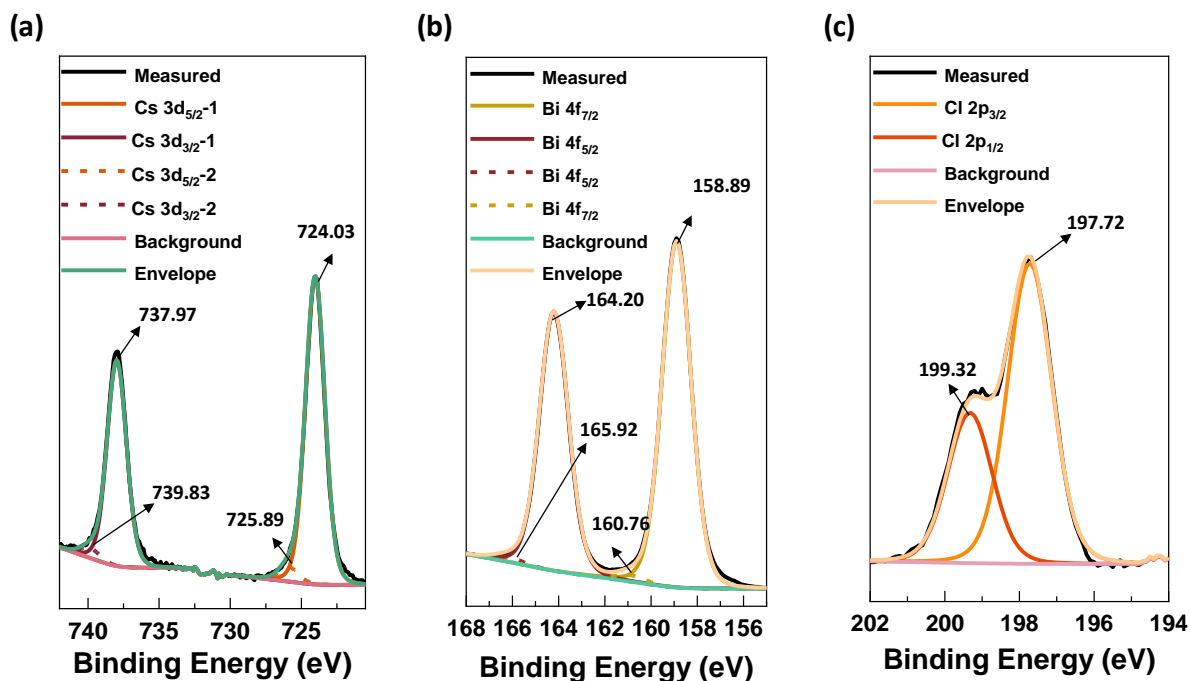

**Figure S18.** XPS analysis of  $\text{Cs}_3\text{Bi}_2\text{Cl}_9$  before and after  $\text{CO}_2$  photoreduction: (a) Cs 3d (b) Bi 4f (c) Cl 2p.

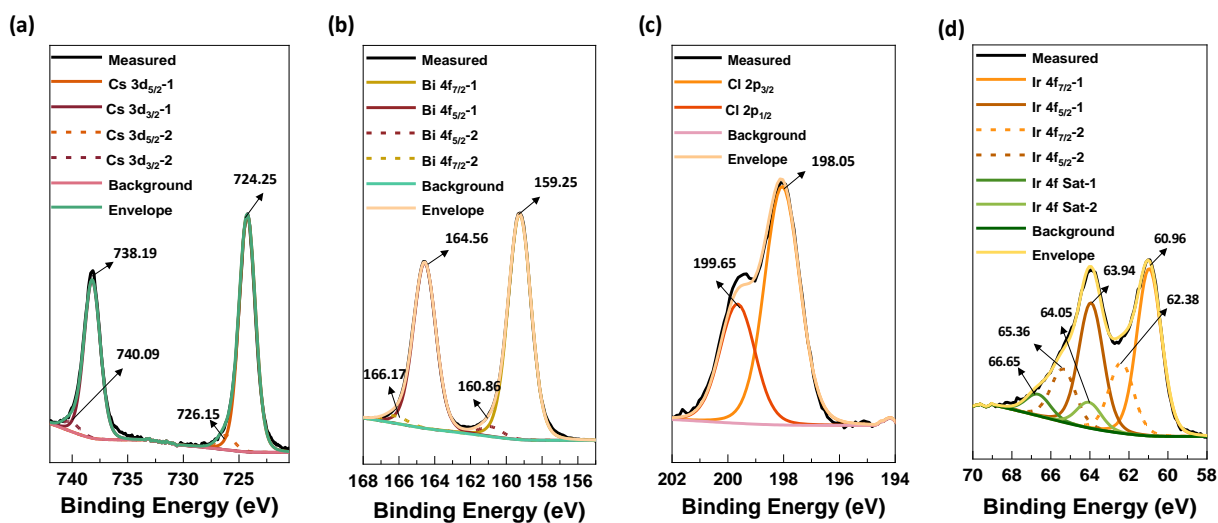

**Figure S19.** XPS analysis of  $\text{Cs}_3\text{Bi}_2\text{Cl}_9\text{-Ir/IrO}_x$  before and after  $\text{CO}_2$  photoreduction: (a) Cs 3d (b) Bi 4f (c) Cl 2p (d) Ir 4f.

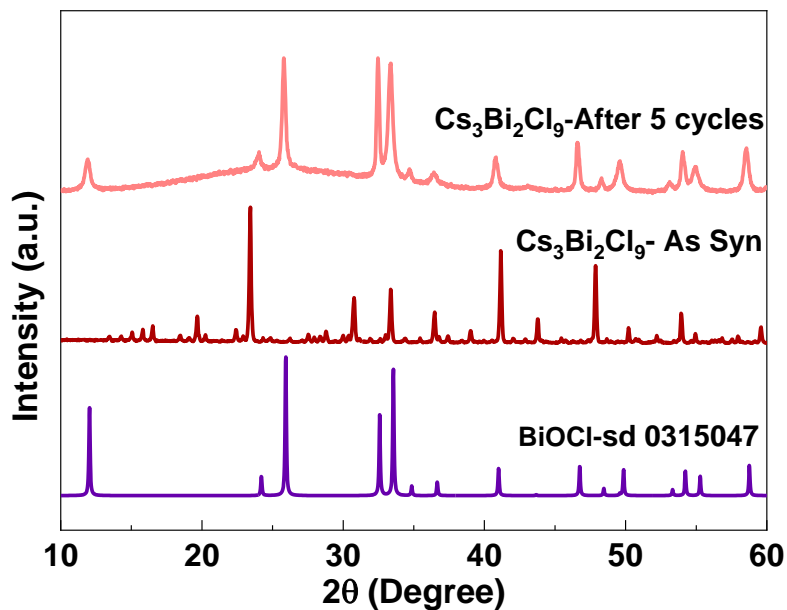

**Figure S20.** PXRD patterns of  $\text{Cs}_3\text{Bi}_2\text{Cl}_9$  after five cycles of photocatalytic  $\text{CO}_2$  reduction.

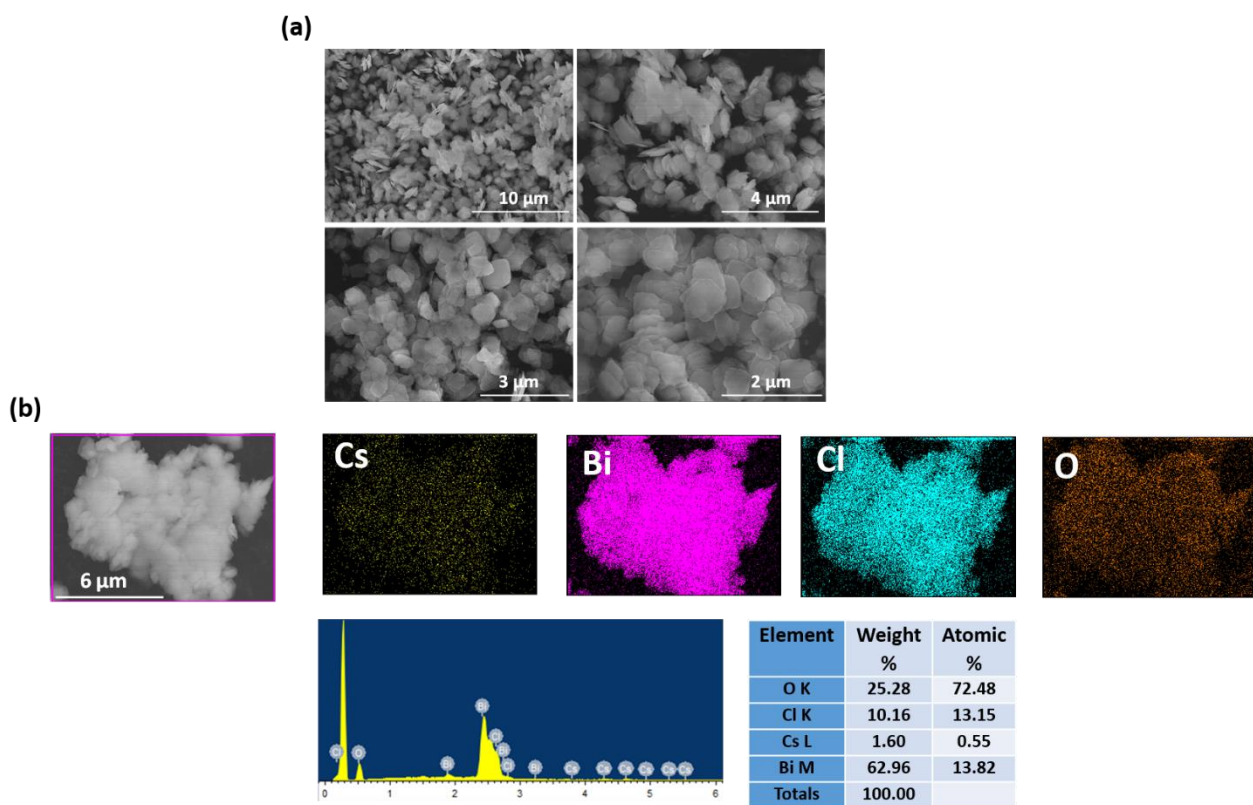

**Figure S21.** (a) SEM images of  $\text{Cs}_3\text{Bi}_2\text{Cl}_9$  after five cycles of photocatalytic  $\text{CO}_2$  reduction (b) EDAX elemental mapping.

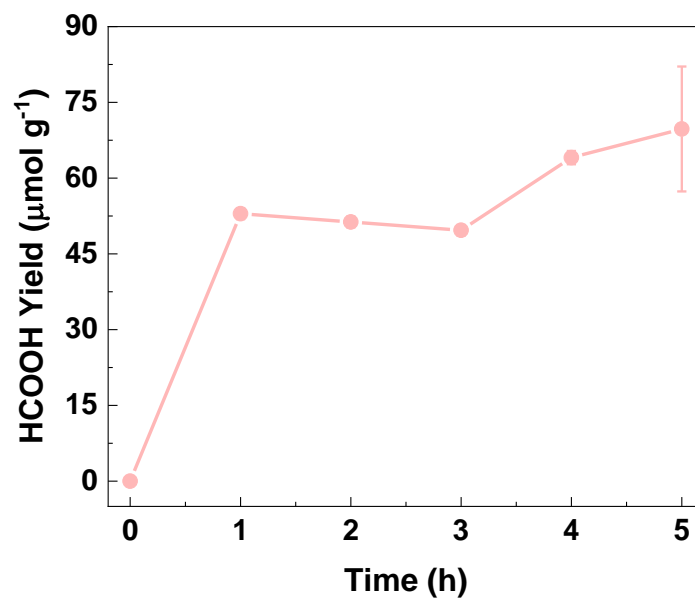

**Figure S22.** HCOOH yield on  $\text{Cs}_3\text{Bi}_2\text{Cl}_9\text{-H}_2\text{O}$  as a function of reaction time

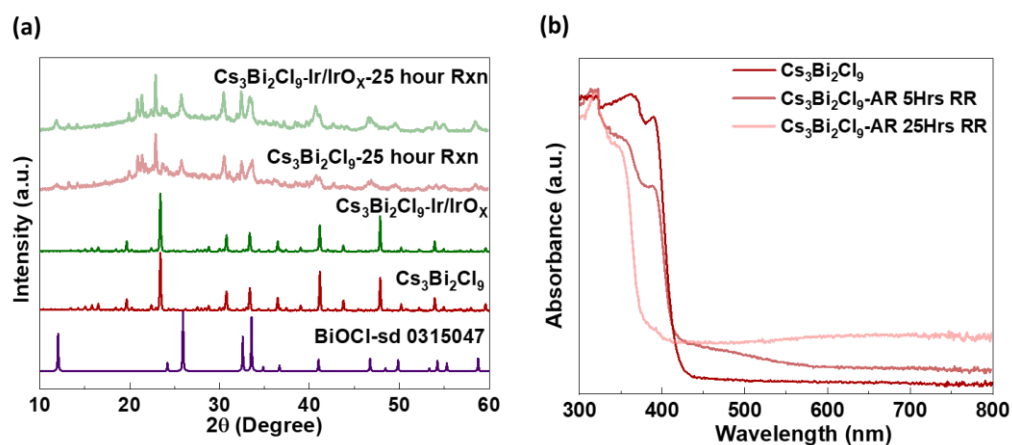

**Figure S23.** (a) PXRD patterns of  $\text{Cs}_3\text{Bi}_2\text{Cl}_9$ ,  $\text{Cs}_3\text{Bi}_2\text{Cl}_9\text{-Ir/IrO}_x$  after 25 hours of continuous photocatalytic  $\text{CO}_2$  reduction and their (b) corresponding absorption spectra.

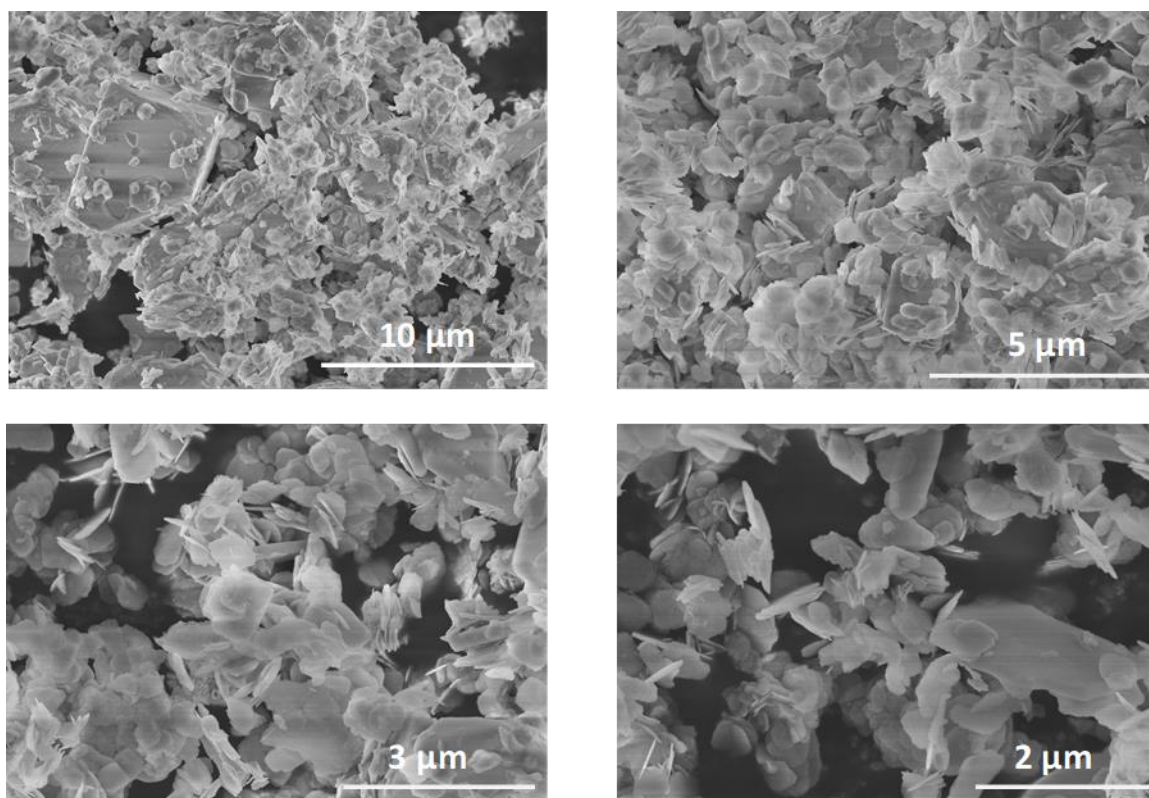

**Figure S24.** SEM images of Cs<sub>3</sub>Bi<sub>2</sub>Cl<sub>9</sub> after 25 hours continuous photocatalytic CO<sub>2</sub> reduction.

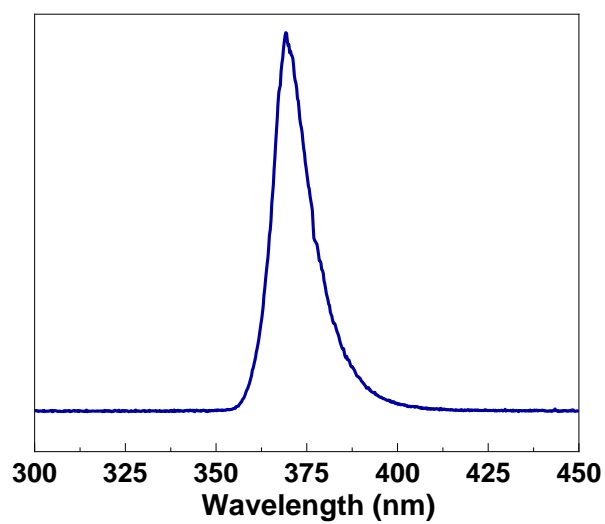

**Figure S25.** Emission spectrum of 5 W UV-A LED that was used to conduct photocatalytic CO<sub>2</sub> reduction reactions.



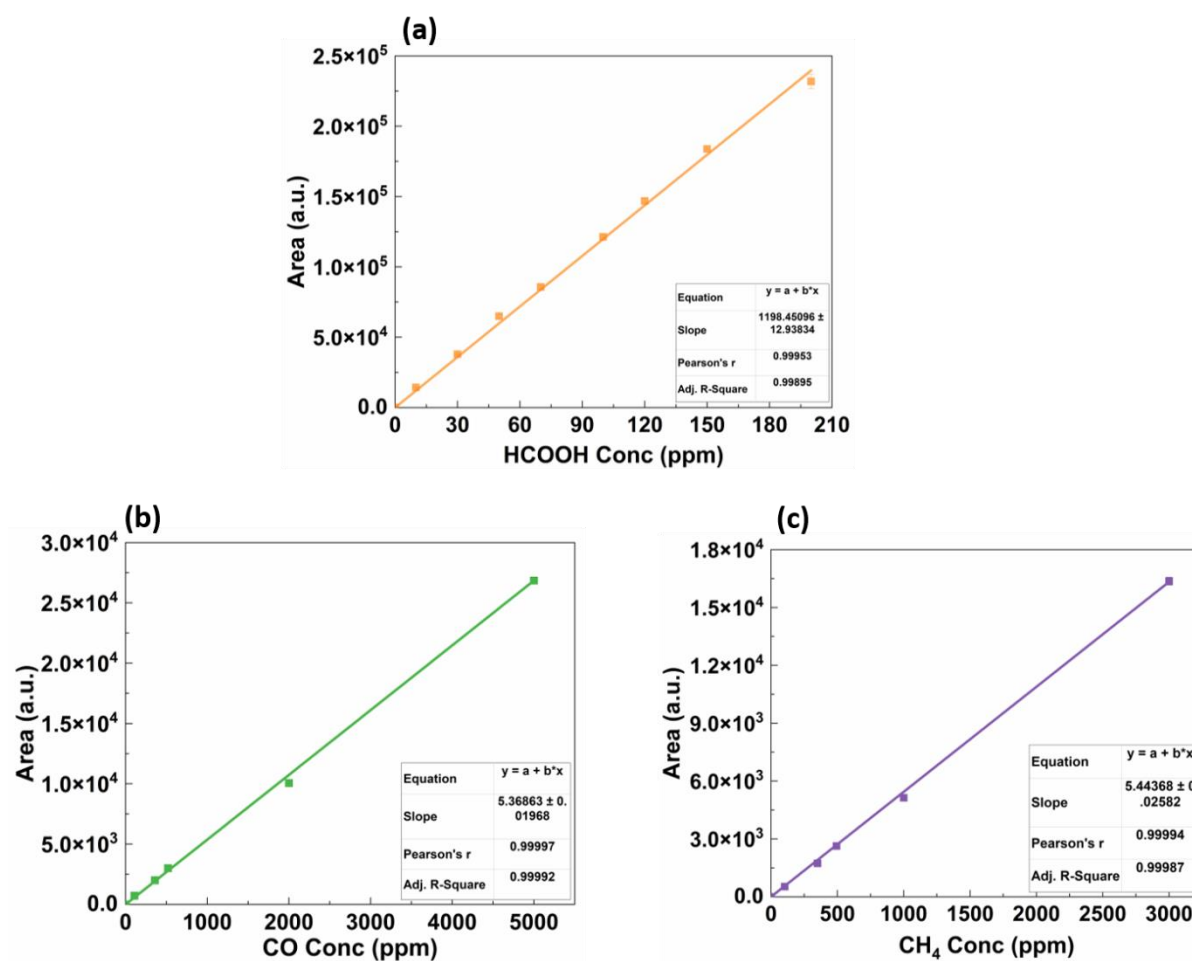

**Figure S26.** Standardization curves for (a) formic acid (b) carbon monoxide, and (c) methane.

## References

- 1 F. Dong, J. Sheng, Y. He, J. Li, C. Yuan, H. Huang, S. Wang, Y. Sun and Z. Wang, *ACS Nano*, 2020, **14**, 13103–13114.
- 2 D. Wu, X. Zhao, Y. Huang, J. Lai, J. Yang, C. Tian, P. He, Q. Huang and X. Tang, *J. Phys. Chem. C*, 2021, **125**, 18328–18333.
- 3 S. S. Bhosale, A. K. Kharade, E. Jokar, A. Fathi, S. M. Chang and E. W. G. Diau, *J. Am. Chem. Soc.*, 2019, **141**, 20434–20442.
- 4 L. Ding, Y. Ding, F. Bai, G. Chen, S. Zhang, X. Yang, H. Li and X. Wang, *Inorg. Chem.*, , DOI:10.1021/acs.inorgchem.2c04041.
- 5 Z. L. Liu, R. R. Liu, Y. F. Mu, Y. X. Feng, G. X. Dong, M. Zhang and T. B. Lu, *Sol. RRL*, , DOI:10.1002/solr.202000691.
